# Supplementary material for: Valence electron energy-loss spectroscopy of silicon negative electrodes for lithium batteries
Source: Royal Society of Chemistry journal article supplement (doi:10.1039/b915245h), 2009-11-09
Supplement: b915245h.pdf [file b915245h.pdf]

Supplementary materials for: “Valence electron energy-loss spectroscopy of silicon negative electrodes for lithium batteries”

Julien Danet, Thierry Brousse, Karsten Rasim, Dominique Guyomard and Philippe Moreau

**I – Core losses for  $\text{Li}_x\text{Si}$  reference alloys**

In order to clearly demonstrate the variation of the respective intensities of the Li K and Si  $L_{2,3}$  edges, experimental spectra for the four alloys are presented in Figure 1.

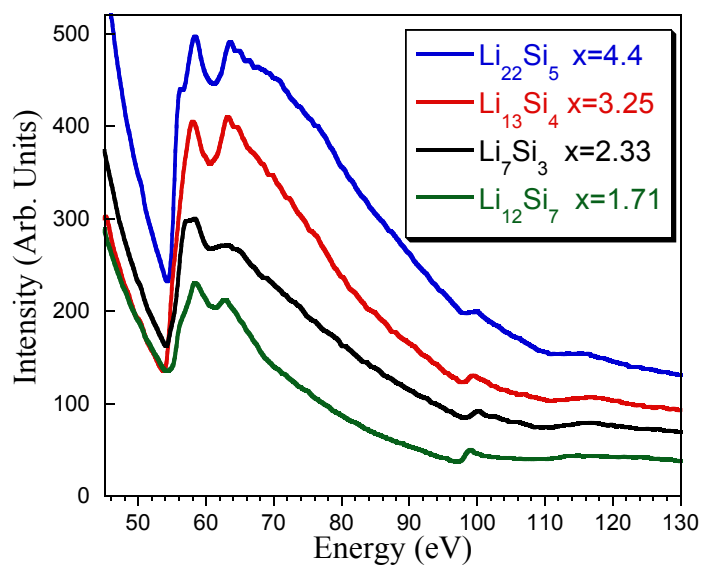

Figure 1: core loss EELS spectra for the four  $\text{Li}_x\text{Si}$  alloys.

## II – Comparison between experimental and theoretical spectra.

Rather than comparing the complete set of experimental spectra with the complete set of theoretical ones (see paper), a one to one comparison is also useful. This comparison is presented in Figure 2.

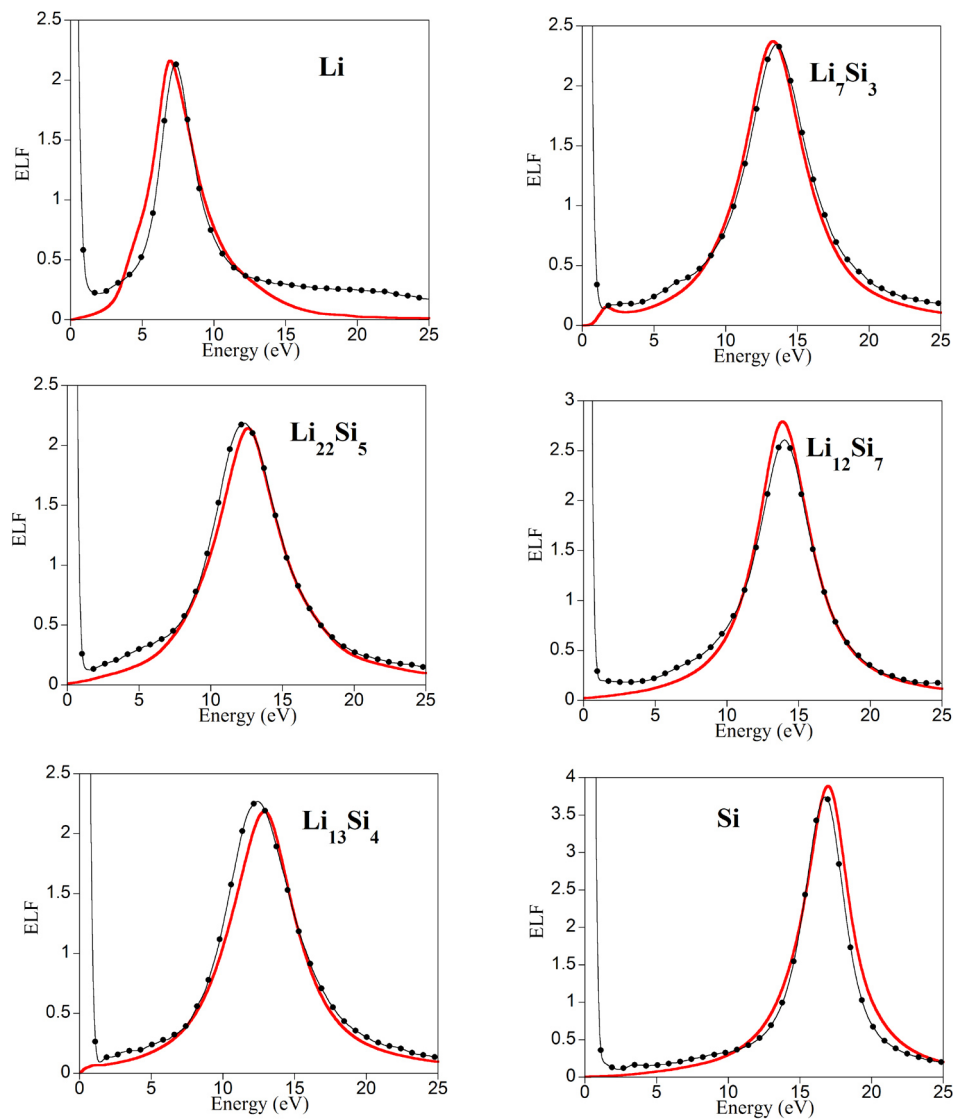

Figure 2: comparison of experimental (line with dots) with theoretical spectra (red line) for reference compounds.
